# Supplementary material for: Evaluation of Simplified Diet Scores Related to C-Reactive Protein in Heavy Smokers Undergoing Lung Cancer Screening
Source: MDPI journal article supplement (doi:10.3390/nu14204312), 2022-10-15
Supplement: s1 [file s1]

## Supplementary Materials

### Evaluation of Simplified Diet Scores Related to C-Reactive Protein in Heavy Smokers Undergoing Lung Cancer Screening

**Table S1.** The original Mediterranean Diet Adherence Screener (MEDAS) items and score criteria.

| Question                                                                                                                                                         | Criterion to score 1 point |
|------------------------------------------------------------------------------------------------------------------------------------------------------------------|----------------------------|
| 1. Do you use olive oil as the principal source of fat for cooking?                                                                                              | Yes                        |
| 2. How much olive oil do you consume per day (including that used in frying, salads, meals eaten away from home, etc.)?                                          | ≥4 tbsp                    |
| 3. How many servings (80 g for salads and 200 g for others) of vegetables do you consume per day?                                                                | ≥2                         |
| 4. How many pieces of fruit (including fresh-squeezed juice) do you consume per day?                                                                             | ≥3                         |
| 5. How many servings (100 g) of red meat, hamburger, or sausages do you consume per day?                                                                         | <1                         |
| 6. How many servings (12 g) of butter, margarine, or cream do you consume per day?                                                                               | <1                         |
| 7. How many carbonated and/or sugar-sweetened beverages do you consume per day?                                                                                  | <1 glass                   |
| 8. Do you drink wine? How much do you consume per week?                                                                                                          | ≥7 cup (125 ml)            |
| 9. How many servings (150 g) of legumes do you consume per week?                                                                                                 | ≥3                         |
| 10. How many servings (150 g of fish and 200g of seafood) of fish/seafood do you consume per week?                                                               | ≥3                         |
| 11. How many times do you consume commercial (not homemade) pastry such as cookies or cake per week?                                                             | <3                         |
| 12. How many times do you consume nuts per week? (30 g)                                                                                                          | ≥3                         |
| 13. Do you prefer to eat chicken, turkey or rabbit instead of beef, pork, hamburgers, or sausages?                                                               | Yes                        |
| 14. How many times per week do you consume boiled vegetables, pasta, rice, or other dishes with a sauce of tomato, garlic, onion, or leeks sautéed in olive oil? | ≥2                         |

**tbsp**, tablespoon.

**Table S2.** Selected food items and score criteria added to the original MEDAS for the revised-MEDAS scores.

| Question                                                                                                           | Criterion to score 1 point |
|--------------------------------------------------------------------------------------------------------------------|----------------------------|
| 15. How much sugar do you consume per day?                                                                         | <2 tsp                     |
| 16. How many servings (80 g pasta/rice and 50 g bread) of whole grain cereals do you consume per week?             | ≥1                         |
| 17. How many servings (200 g vegetables and 150 g fruits) of orange vegetables and fruits do you consume per week? | ≥2                         |
| 18. How much coffee do you consume per day? <sup>a</sup>                                                           | ≥2 cup                     |

**tsp**, teaspoon.

<sup>a</sup> Data available only from long questionnaires (n=1219).

**Table S3.** Odds ratio (OR) of C-Reactive Protein (CRP)  $\geq 2$  mg/L versus CRP  $< 2$  mg/L, and corresponding 95% confidence intervals (CI), according to body mass index (BMI) value.

|               | All subjects | CRP $\geq 2$ mg/L | OR (95%CI) <sup>a</sup><br>CRP $\geq 2$ mg/L vs. CRP $< 2$ mg/L |
|---------------|--------------|-------------------|-----------------------------------------------------------------|
|               | N            | %                 |                                                                 |
| Total         | 2438         | 34.2              |                                                                 |
| BMI           |              |                   |                                                                 |
| Underweight   | 38           | 18.4              | 0.69 (0.30-1.60)                                                |
| normal weight | 1065         | 24.4              | Ref                                                             |
| Overweight    | 1022         | 37.9              | 1.90 (1.55-2.32)                                                |
| Obese         | 313          | 57.2              | 4.27 (3.24-5.64)                                                |

**BMI**, Body Mass Index. **CRP**, C-Reactive protein. **OR**, Odds Ratio. **CI**, confidence intervals.

<sup>a</sup> ORs were estimated using unconditional multiple logistic regression models after adjustment for sex, age, pack-years, smoking status, FEV<sub>1</sub>%, chronic diseases, metformin, statin, and Acetylsalicylic acid.
